# Supplementary material for: Achieving over 30% photon-to-photon efficiency with tandem OLED structures in organic upconversion devices
Source: Royal Society of Chemistry journal article supplement (doi:10.1039/d5tc00998g), 2025-01-01
Supplement: d5tc00998g1.pdf [file d5tc00998g1.pdf]

## Supporting Information

### **Achieving Over 30% Photon-to-Photon Efficiency with Tandem OLED Structures in Organic Upconversion Devices**

Xingwei Han<sup>1</sup>, Jiayue Han<sup>1,2</sup>, Meiyu He<sup>1</sup>, Chao Han<sup>1</sup>, Lei Guo<sup>1</sup>, He Yu<sup>1,2</sup>, Jun Gou<sup>1,2</sup>, Jun Wang<sup>1,2\*</sup>

<sup>1</sup>School of Optoelectronic Science and Engineering, University of Electronic Science and Technology of China, Chengdu 610054, China

<sup>2</sup>State Key Laboratory of Electronic Thin Films and Integrated Devices, University of Electronic Science and Technology of China, Chengdu 610054, China

\* Corresponding author. E-mail: [wjun@uestc.edu.cn](mailto:wjun@uestc.edu.cn)

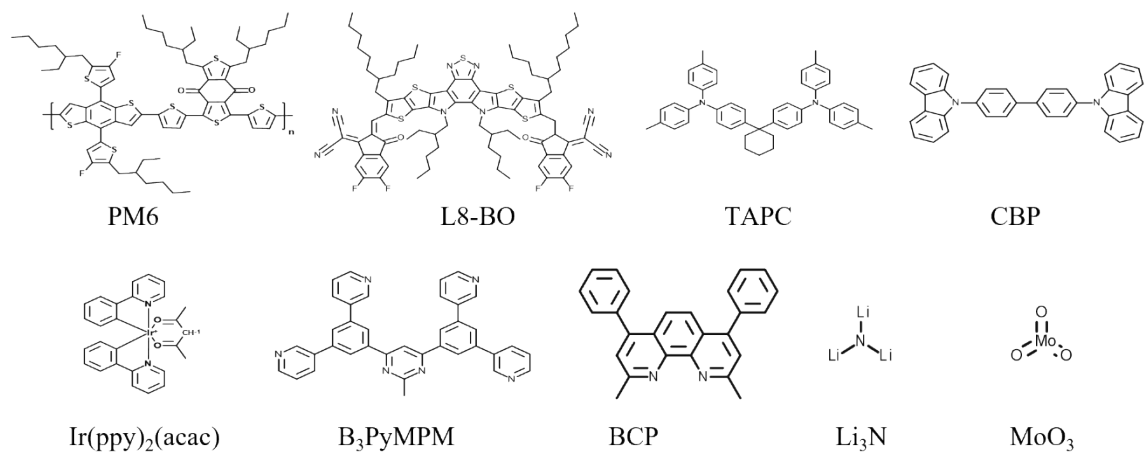

**Figure S1.** The molecular structures of the materials utilized in this work.

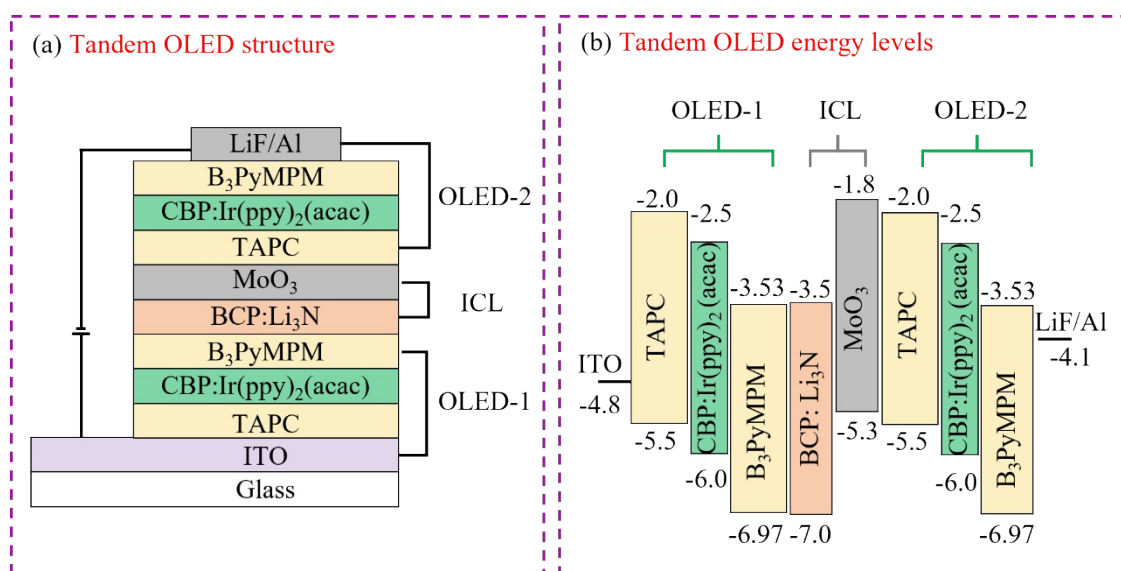

**Figure S2.** Tandem OLED structure and principles. (a) Schematic diagram of the structure; (b) Energy level diagram.

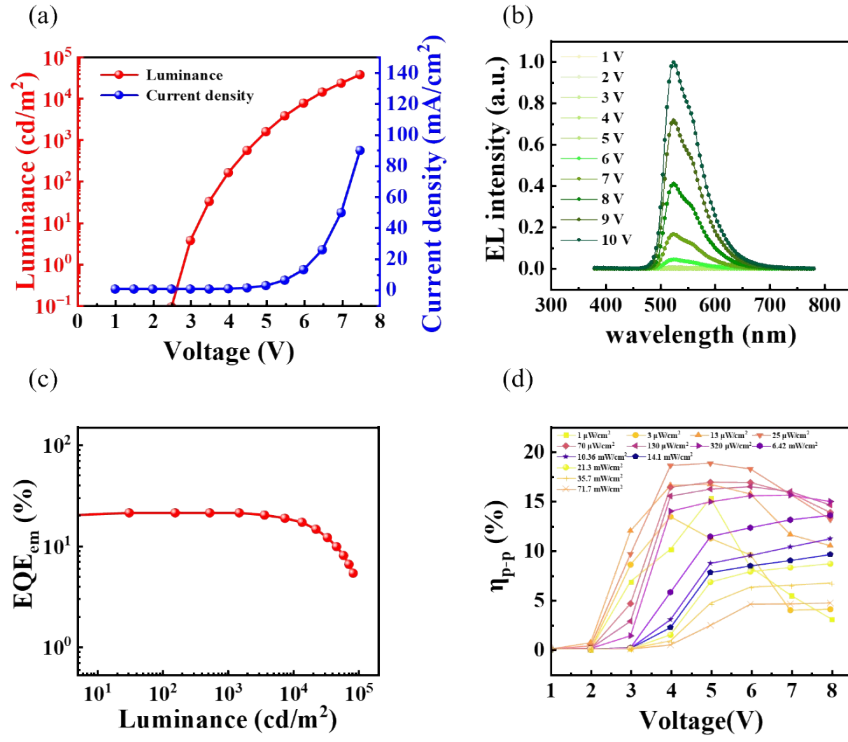

**Figure S3.** Performance of single OLED. (a) J-V-L characteristic curves of a single OLED; (b) Electroluminescence spectra at different bias voltages; (c)  $\text{EQE}_{\text{em}}$  at various luminance levels; (d)  $\eta_{\text{p-p}}$  of the OUD based on a single OLED.

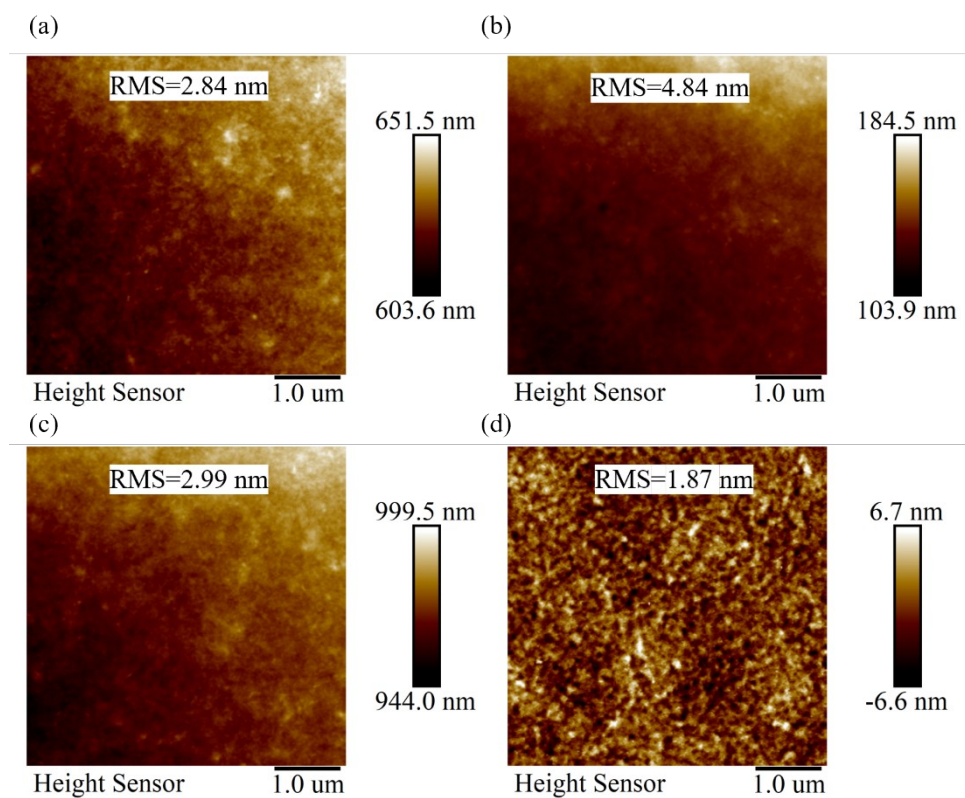

**Figure S4.** AFM characterization of film surfaces. (a) OLED-1 film; (b) OLED-1/BCP:Li<sub>3</sub>N/MoO<sub>3</sub> film; (c) OLED-1/BCP:Li<sub>3</sub>N/MoO<sub>3</sub>/OLED-2 film; (d) standalone PM6:L8-BO film.

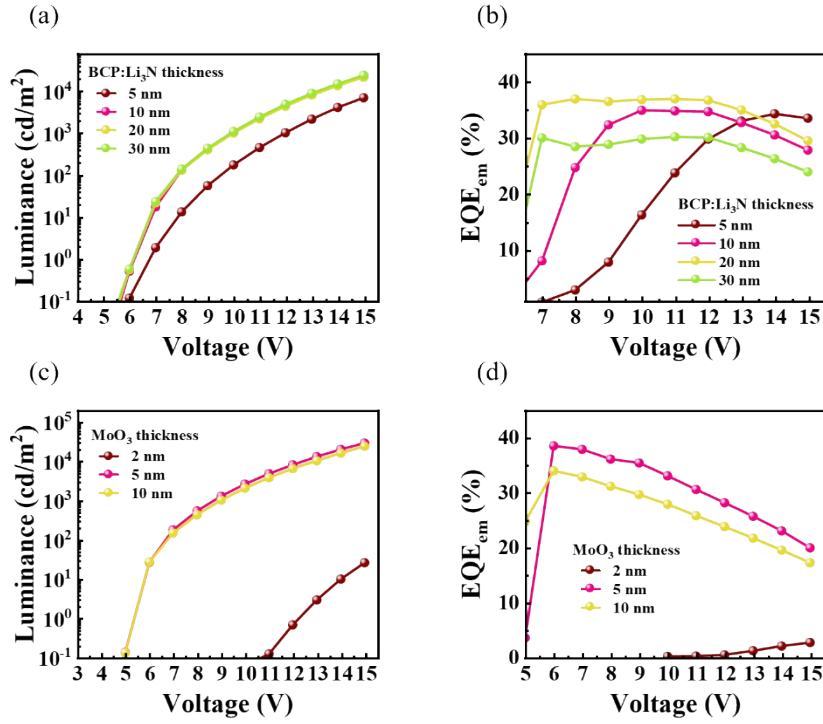

**Figure S5.** Impact of ICL thickness on tandem OLED performance. (a) Effect of BCP:Li<sub>3</sub>N layer thickness on luminance; (b) Effect of BCP:Li<sub>3</sub>N layer thickness on EQE<sub>em</sub>; (c) Effect of MoO<sub>3</sub> layer thickness on luminance; (d) Effect of MoO<sub>3</sub> layer thickness on EQE<sub>em</sub>.

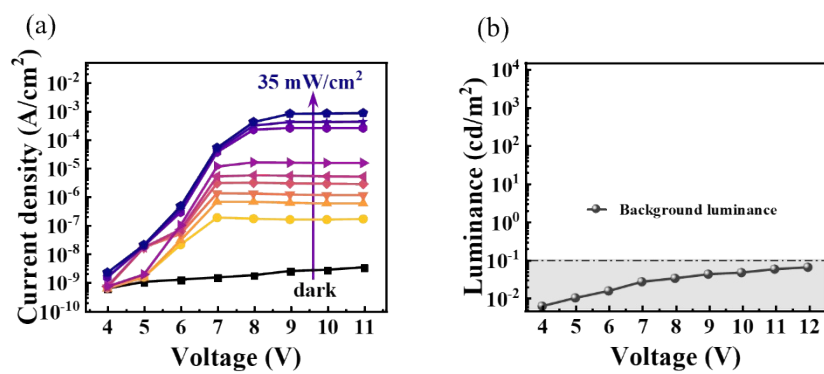

**Figure S6.** (a) J-V characteristics under different incident light power densities; (b) Background luminance under different bias voltages

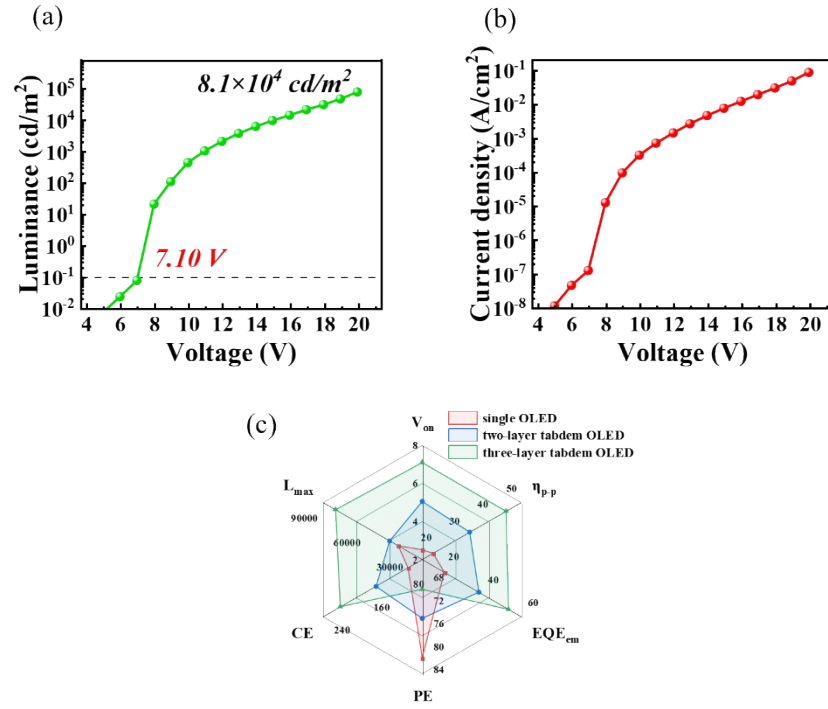

**Figure S7.** Performance characterization of the three-layer tandem OLED. (a) L-V characteristics; (b) J-V characteristics. (c) The performance comparison of devices with different numbers of tandem OLEDs.



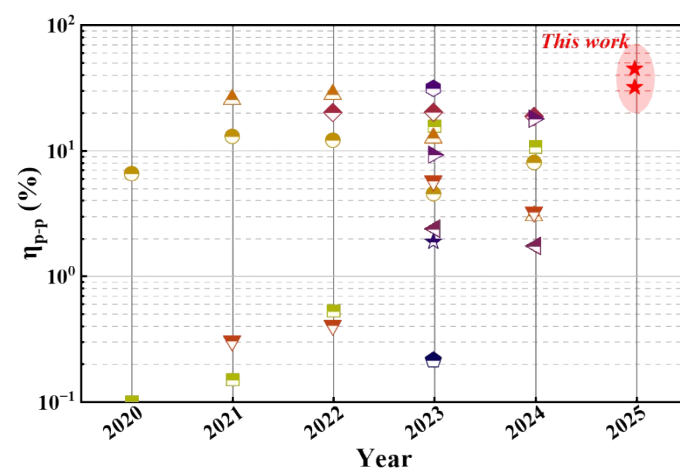

**Figure S8.** Comparison of  $\eta_{p-p}$  for upconversion devices over the past five years.

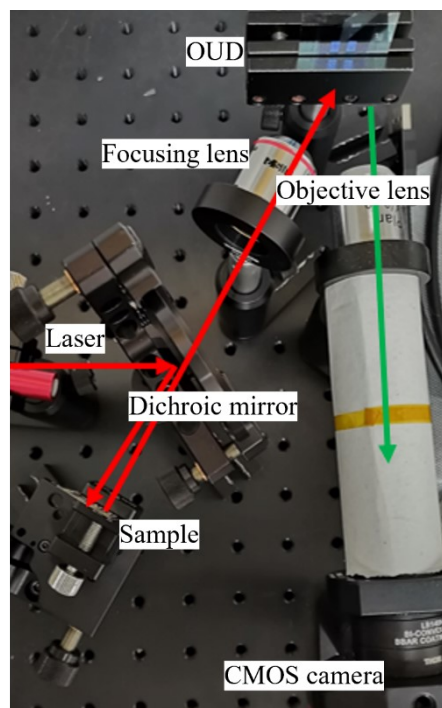

**Figure S9.** Practical optical path for upconversion imaging of infrared reflected light from samples.
